# Supplementary material for: Fine Motor Skill Decline after Brain RT – A Multivariate Normal Tissue Complication Probability Study of a Prospective Trial
Source: bioRxiv or medRxiv preprint supplement (doi:10.1101/2022.09.02.22279544), 2022-09-04
Supplement: Supplementary file [file media-1.pdf]

|                              | Decision Stump |                    | Logistic Regression |         | Spearman Correlation |         | Non-parametric |
|------------------------------|----------------|--------------------|---------------------|---------|----------------------|---------|----------------|
|                              | Cutoff         | AUC (95% CI)       | OR (95% CI)         | p-value | R <sub>s</sub>       | p-value | p-value        |
| <b>Corticospinal Tract</b>   |                |                    |                     |         |                      |         |                |
| D <sub>max</sub>             | 19.61          | 0.60 (0.47 - 0.74) | 1.01 (0.97 - 1.04)  | 0.64    | 0.09                 | 0.57    | 0.29           |
| D <sub>mean</sub>            | 0.57           | 0.52 (0.48 - 0.57) | 1.01 (0.97 - 1.06)  | 0.60    | 0.07                 | 0.65    | 0.33           |
| <b>Precentral Cortex</b>     |                |                    |                     |         |                      |         |                |
| D <sub>max</sub>             | 52.17          | 0.59 (0.47 - 0.71) | 1.00 (0.97 - 1.03)  | 1.00    | 0.04                 | 0.83    | 0.42           |
| D <sub>mean</sub>            | 17.14          | 0.60 (0.46 - 0.74) | 0.98 (0.93 - 1.04)  | 0.56    | -0.07                | 0.68    | 0.67           |
| <b>Precentral WM</b>         |                |                    |                     |         |                      |         |                |
| D <sub>max</sub>             | 27.63          | 0.58 (0.43 - 0.74) | 1.00 (0.97 - 1.03)  | 0.96    | 0.01                 | 0.93    | 0.47           |
| D <sub>mean</sub>            | 0.31           | 0.58 (0.46 - 0.69) | 0.99 (0.94 - 1.04)  | 0.64    | -0.04                | 0.82    | 0.60           |
| <b>Postcentral Cortex</b>    |                |                    |                     |         |                      |         |                |
| D <sub>max</sub>             | 57.54          | 0.57 (0.45 - 0.68) | 1.00 (0.98 - 1.03)  | 0.78    | 0.03                 | 0.85    | 0.43           |
| D <sub>mean</sub>            | 0.12           | 0.58 (0.47 - 0.68) | 1.01 (0.95 - 1.06)  | 0.85    | <-0.001              | 0.98    | 0.52           |
| <b>Postcentral WM</b>        |                |                    |                     |         |                      |         |                |
| D <sub>max</sub>             | 58.95          | 0.57 (0.49 - 0.65) | 1.01 (0.98 - 1.03)  | 0.67    | 0.10                 | 0.53    | 0.27           |
| D <sub>mean</sub>            | 0.10           | 0.58 (0.47 - 0.68) | 1.00 (0.96 - 1.06)  | 0.88    | 0.03                 | 0.86    | 0.43           |
| <b>Paracentral Cortex</b>    |                |                    |                     |         |                      |         |                |
| D <sub>max</sub>             | 37.17          | 0.61 (0.46 - 0.76) | 0.99 (0.96 - 1.01)  | 0.37    | -0.07                | 0.68    | 0.67           |
| D <sub>mean</sub>            | 22.70          | 0.60 (0.47 - 0.74) | 0.99 (0.95 - 1.02)  | 0.52    | -0.06                | 0.71    | 0.65           |
| <b>Paracentral WM</b>        |                |                    |                     |         |                      |         |                |
| D <sub>max</sub>             | 33.16          | 0.61 (0.46 - 0.76) | 0.99 (0.96 - 1.02)  | 0.48    | -0.09                | 0.59    | 0.71           |
| D <sub>mean</sub>            | 0.24           | 0.58 (0.45 - 0.71) | 0.99 (0.95 - 1.03)  | 0.60    | -0.04                | 0.83    | 0.59           |
| <b>Caudate</b>               |                |                    |                     |         |                      |         |                |
| D <sub>max</sub>             | 0.35           | 0.52 (0.48 - 0.57) | 1.00 (0.97 - 1.03)  | 0.97    | 0.01                 | 0.94    | 0.47           |
| D <sub>mean</sub>            | 34.29          | 0.58 (0.46 - 0.69) | 0.99 (0.95 - 1.03)  | 0.68    | -0.05                | 0.74    | 0.64           |
| <b>Pallidum</b>              |                |                    |                     |         |                      |         |                |
| D <sub>max</sub>             | 5.56           | 0.59 (0.47 - 0.71) | 1.00 (0.97 - 1.03)  | 0.95    | -0.03                | 0.88    | 0.57           |
| D <sub>mean</sub>            | 0.61           | 0.55 (0.48 - 0.61) | 1.01 (0.98 - 1.04)  | 0.66    | 0.02                 | 0.92    | 0.46           |
| <b>Putamen</b>               |                |                    |                     |         |                      |         |                |
| D <sub>max</sub>             | 1.53           | 0.55 (0.48 - 0.61) | 1.00 (0.97 - 1.02)  | 0.77    | -0.06                | 0.70    | 0.66           |
| D <sub>mean</sub>            | 0.32           | 0.55 (0.48 - 0.61) | 1.01 (0.97 - 1.04)  | 0.76    | -0.03                | 0.84    | 0.59           |
| <b>Thalamus</b>              |                |                    |                     |         |                      |         |                |
| D <sub>max</sub>             | 0.85           | 0.55 (0.48 - 0.61) | 1.01 (0.98 - 1.04)  | 0.61    | 0.07                 | 0.65    | 0.33           |
| D <sub>mean</sub>            | 21.37          | 0.59 (0.43 - 0.74) | 1.01 (0.98 - 1.04)  | 0.63    | 0.08                 | 0.61    | 0.31           |
| <b>Cerebellum Cortex</b>     |                |                    |                     |         |                      |         |                |
| D <sub>max</sub>             | 0.03           | 0.62 (0.53 - 0.72) | 1.00 (0.98 - 1.03)  | 0.77    | 0.10                 | 0.56    | 0.28           |
| D <sub>mean</sub>            | 0.00           | 0.62 (0.53 - 0.72) | 0.99 (0.93 - 1.04)  | 0.62    | 0.05                 | 0.76    | 0.38           |
| <b>Cerebellum WM</b>         |                |                    |                     |         |                      |         |                |
| D <sub>max</sub>             | 0.01           | 0.60 (0.51 - 0.69) | 1.01 (0.98 - 1.04)  | 0.68    | 0.10                 | 0.54    | 0.27           |
| D <sub>mean</sub>            | 0.00           | 0.60 (0.51 - 0.69) | 0.99 (0.94 - 1.04)  | 0.70    | 0.07                 | 0.66    | 0.34           |
| <b>Demographic/Clinical</b>  |                |                    |                     |         |                      |         |                |
| Adjuvant Chemotherapy        | -              | 0.57 (0.42 - 0.72) | 1.82 (0.53 - 6.55)  | 0.35    | 0.15                 | 0.36    | 0.53           |
| Age                          | 27.00          | 0.57 (0.47 - 0.67) | 1.00 (0.96 - 1.05)  | 0.95    | 0.04                 | 0.80    | 0.40           |
| Anti-Epileptic Drug Use      | -              | 0.57 (0.42 - 0.72) | 1.79 (0.53 - 6.29)  | 0.35    | 0.14                 | 0.37    | 0.54           |
| Concurrent Chemotherapy      | -              | 0.55 (0.39 - 0.70) | 1.47 (0.44 - 5.06)  | 0.54    | 0.10                 | 0.55    | 0.76           |
| Diagnosis (Other)            | -              | 0.55 (0.40 - 0.70) | 0.67 (0.19 - 2.33)  | 0.53    | -0.10                | 0.54    | 0.75           |
| Dose                         | 60.60          | 0.55 (0.48 - 0.61) | 1.09 (0.94 - 1.29)  | 0.28    | 0.11                 | 0.49    | 0.24           |
| Ethnicity (Non-Hispanic)     | -              | 0.57 (0.49 - 0.65) | -                   | 0.99    | 0.28                 | 0.08    | 0.23           |
| Handedness (R)               | -              | 0.52 (0.42 - 0.62) | 0.63 (0.08 - 4.24)  | 0.64    | -0.07                | 0.64    | 1.00           |
| KPS ( $\leq 80$ )            | -              | 0.52 (0.44 - 0.60) | 2.11 (0.19 - 47.52) | 0.56    | 0.09                 | 0.56    | 1.00           |
| Progression at 6mo           | -              | 0.57 (0.49 - 0.65) | -                   | 0.99    | -0.28                | 0.08    | 0.23           |
| Race (Other)                 | -              | 0.50 (0.50 - 0.50) | 1.00 (0.11 - 9.05)  | 1.00    | 0.00                 | 1.00    | 1.00           |
| Radiation Modality (Protons) | -              | 0.50 (0.50 - 0.50) | 1.00 (0.27 - 3.66)  | 1.00    | 0.00                 | 1.00    | 1.00           |
| Seizures                     | -              | 0.62 (0.47 - 0.77) | 2.75 (0.79 - 10.38) | 0.12    | 0.24                 | 0.12    | 0.21           |
| Sex (M)                      | -              | 0.52 (0.37 - 0.68) | 1.22 (0.35 - 4.26)  | 0.75    | 0.05                 | 0.76    | 1.00           |
| Steroid Use                  | -              | 0.52 (0.37 - 0.68) | 1.22 (0.35 - 4.26)  | 0.75    | 0.05                 | 0.76    | 1.00           |
| Surgery (any)                | -              | 0.55 (0.44 - 0.66) | 2.24 (0.39 - 17.63) | 0.39    | 0.14                 | 0.39    | 0.66           |
| Surgery (GTR)                | -              | 0.52 (0.40 - 0.65) | 0.75 (0.16 - 3.34)  | 0.71    | -0.06                | 0.72    | 1.00           |
| Tumor Laterality             | -              | 0.52 (0.37 - 0.68) | 1.21 (0.36 - 4.16)  | 0.76    | 0.05                 | 0.76    | 1.00           |

Table S1: Univariate analyses for decline on PNDH

|                              | Decision Stump |                    | Logistic Regression |         | Spearman Correlation |         | Non-parametric |
|------------------------------|----------------|--------------------|---------------------|---------|----------------------|---------|----------------|
|                              | Cutoff         | AUC (95% CI)       | OR (95% CI)         | p-value | R <sub>s</sub>       | p-value | p-value        |
| <b>Corticospinal Tract</b>   |                |                    |                     |         |                      |         |                |
| D <sub>max</sub>             | 59.33          | 0.59 (0.47 - 0.71) | 1.02 (0.98 - 1.07)  | 0.31    | 0.17                 | 0.27    | 0.14           |
| D <sub>mean</sub>            | 7.28           | 0.63 (0.50 - 0.75) | 0.99 (0.93 - 1.04)  | 0.65    | -0.04                | 0.81    | 0.60           |
| <b>Precentral Cortex</b>     |                |                    |                     |         |                      |         |                |
| D <sub>max</sub>             | 1.00           | 0.68 (0.52 - 0.84) | 1.00 (0.96 - 1.03)  | 0.79    | -0.07                | 0.67    | 0.67           |
| D <sub>mean</sub>            | 0.35           | 0.68 (0.52 - 0.84) | 1.01 (0.95 - 1.07)  | 0.70    | -0.13                | 0.40    | 0.81           |
| <b>Precentral WM</b>         |                |                    |                     |         |                      |         |                |
| D <sub>max</sub>             | 0.78           | 0.68 (0.52 - 0.84) | 1.00 (0.97 - 1.03)  | 1.00    | -0.05                | 0.77    | 0.62           |
| D <sub>mean</sub>            | 42.45          | 0.59 (0.47 - 0.71) | 1.01 (0.96 - 1.07)  | 0.57    | -0.09                | 0.55    | 0.73           |
| <b>Postcentral Cortex</b>    |                |                    |                     |         |                      |         |                |
| D <sub>max</sub>             | 0.05           | 0.59 (0.47 - 0.71) | 1.00 (0.96 - 1.03)  | 0.82    | -0.11                | 0.48    | 0.77           |
| D <sub>mean</sub>            | 0.00           | 0.59 (0.47 - 0.71) | 0.99 (0.93 - 1.05)  | 0.84    | -0.15                | 0.34    | 0.84           |
| <b>Postcentral WM</b>        |                |                    |                     |         |                      |         |                |
| D <sub>max</sub>             | 9.79           | 0.59 (0.47 - 0.71) | 1.00 (0.97 - 1.04)  | 0.87    | -0.04                | 0.78    | 0.62           |
| D <sub>mean</sub>            | 2.29           | 0.59 (0.47 - 0.71) | 1.00 (0.94 - 1.05)  | 0.97    | -0.12                | 0.46    | 0.78           |
| <b>Paracentral Cortex</b>    |                |                    |                     |         |                      |         |                |
| D <sub>max</sub>             | 0.45           | 0.71 (0.55 - 0.88) | 1.00 (0.97 - 1.03)  | 1.00    | -0.09                | 0.58    | 0.72           |
| D <sub>mean</sub>            | 0.30           | 0.71 (0.55 - 0.88) | 1.01 (0.97 - 1.05)  | 0.73    | -0.11                | 0.48    | 0.77           |
| <b>Paracentral WM</b>        |                |                    |                     |         |                      |         |                |
| D <sub>max</sub>             | 0.51           | 0.71 (0.55 - 0.88) | 1.00 (0.97 - 1.03)  | 0.88    | -0.07                | 0.64    | 0.69           |
| D <sub>mean</sub>            | 0.33           | 0.69 (0.53 - 0.86) | 1.01 (0.97 - 1.06)  | 0.55    | -0.08                | 0.59    | 0.71           |
| <b>Caudate</b>               |                |                    |                     |         |                      |         |                |
| D <sub>max</sub>             | 0.35           | 0.55 (0.46 - 0.63) | 1.00 (0.96 - 1.03)  | 0.82    | -0.02                | 0.89    | 0.56           |
| D <sub>mean</sub>            | 1.63           | 0.62 (0.46 - 0.78) | 0.99 (0.95 - 1.03)  | 0.68    | -0.13                | 0.41    | 0.80           |
| <b>Pallidum</b>              |                |                    |                     |         |                      |         |                |
| D <sub>max</sub>             | 61.38          | 0.55 (0.46 - 0.63) | 1.00 (0.97 - 1.03)  | 0.94    | -0.02                | 0.89    | 0.56           |
| D <sub>mean</sub>            | 0.40           | 0.55 (0.46 - 0.63) | 0.99 (0.95 - 1.03)  | 0.62    | -0.04                | 0.78    | 0.61           |
| <b>Putamen</b>               |                |                    |                     |         |                      |         |                |
| D <sub>max</sub>             | 62.08          | 0.55 (0.46 - 0.63) | 1.00 (0.97 - 1.04)  | 0.85    | 0.03                 | 0.85    | 0.43           |
| D <sub>mean</sub>            | 6.65           | 0.66 (0.49 - 0.83) | 0.99 (0.95 - 1.03)  | 0.72    | -0.07                | 0.66    | 0.68           |
| <b>Thalamus</b>              |                |                    |                     |         |                      |         |                |
| D <sub>max</sub>             | 3.14           | 0.62 (0.46 - 0.78) | 0.99 (0.96 - 1.02)  | 0.65    | -0.06                | 0.70    | 0.66           |
| D <sub>mean</sub>            | 1.26           | 0.63 (0.48 - 0.79) | 0.98 (0.94 - 1.02)  | 0.44    | -0.13                | 0.40    | 0.81           |
| <b>Cerebellum Cortex</b>     |                |                    |                     |         |                      |         |                |
| D <sub>max</sub>             | 30.15          | 0.67 (0.55 - 0.80) | 0.98 (0.94 - 1.01)  | 0.18    | -0.14                | 0.36    | 0.83           |
| D <sub>mean</sub>            | 12.54          | 0.67 (0.55 - 0.80) | 0.96 (0.88 - 1.03)  | 0.30    | -0.15                | 0.34    | 0.84           |
| <b>Cerebellum WM</b>         |                |                    |                     |         |                      |         |                |
| D <sub>max</sub>             | 21.38          | 0.66 (0.51 - 0.81) | 0.98 (0.94 - 1.01)  | 0.22    | -0.14                | 0.37    | 0.82           |
| D <sub>mean</sub>            | 12.19          | 0.64 (0.50 - 0.79) | 0.96 (0.89 - 1.02)  | 0.26    | -0.14                | 0.38    | 0.82           |
| <b>Demographic/Clinical</b>  |                |                    |                     |         |                      |         |                |
| Adjuvant Chemotherapy        | -              | 0.62 (0.45 - 0.79) | 0.37 (0.09 - 1.44)  | 0.16    | -0.22                | 0.16    | 0.18           |
| Age                          | 41.50          | 0.71 (0.59 - 0.83) | 1.05 (1.00 - 1.11)  | 0.05    | 0.29                 | 0.06    | 0.03           |
| Anti-Epileptic Drug Use      | -              | 0.59 (0.42 - 0.76) | 0.49 (0.12 - 1.86)  | 0.30    | -0.16                | 0.30    | 0.33           |
| Concurrent Chemotherapy      | -              | 0.66 (0.50 - 0.81) | 0.26 (0.05 - 1.05)  | 0.07    | -0.28                | 0.07    | 0.09           |
| Diagnosis (Other)            | -              | 0.64 (0.47 - 0.80) | 3.08 (0.80 - 12.83) | 0.11    | 0.25                 | 0.11    | 0.16           |
| Dose                         | 65.60          | 0.54 (0.46 - 0.62) | 0.94 (0.79 - 1.11)  | 0.50    | -0.18                | 0.25    | 0.88           |
| Ethnicity (Non-Hispanic)     | -              | 0.51 (0.42 - 0.60) | 0.73 (0.06 - 16.70) | 0.81    | -0.04                | 0.81    | 1.00           |
| Handedness (R)               | -              | 0.52 (0.42 - 0.62) | 1.57 (0.20 - 32.57) | 0.70    | 0.06                 | 0.71    | 1.00           |
| KPS ( $\leq 80$ )            | -              | 0.55 (0.50 - 0.60) | -                   | 0.99    | -0.17                | 0.28    | 0.55           |
| Progression at 6mo           | -              | 0.55 (0.50 - 0.60) | -                   | 0.99    | -0.17                | 0.28    | 0.55           |
| Race (Other)                 | -              | 0.56 (0.50 - 0.62) | -                   | 0.99    | -0.19                | 0.21    | 0.56           |
| Radiation Modality (Protons) | -              | 0.62 (0.46 - 0.79) | 3.00 (0.75 - 12.45) | 0.12    | 0.24                 | 0.12    | 0.15           |
| Seizures                     | -              | 0.55 (0.39 - 0.72) | 0.64 (0.15 - 2.49)  | 0.53    | -0.09                | 0.54    | 0.73           |
| Sex (M)                      | -              | 0.66 (0.50 - 0.82) | 0.26 (0.06 - 1.02)  | 0.06    | -0.29                | 0.06    | 0.09           |
| Steroid Use                  | -              | 0.65 (0.51 - 0.79) | 0.23 (0.03 - 1.04)  | 0.08    | -0.28                | 0.07    | 0.09           |
| Surgery (any)                | -              | 0.56 (0.42 - 0.70) | 2.33 (0.40 - 12.67) | 0.32    | 0.15                 | 0.32    | 0.37           |
| Surgery (GTR)                | -              | 0.66 (0.57 - 0.74) | -                   | 0.99    | 0.33                 | 0.03    | 0.04           |
| Tumor Laterality             | -              | 0.53 (0.36 - 0.70) | 0.78 (0.20 - 2.99)  | 0.71    | -0.06                | 0.72    | 0.75           |

Table S2: Univariate analyses for decline on DKEFS-TM

|                                             |
|---------------------------------------------|
| <b>Precentral cortex</b>                    |
| <b>Postcentral cortex</b>                   |
| <b>Paracentral cortex</b>                   |
| <b>Precentral superficial white matter</b>  |
| <b>Postcentral superficial white matter</b> |
| <b>Paracentral superficial white matter</b> |
| <b>Corticospinal tract</b>                  |
| <b>Cerebellar cortex</b>                    |
| <b>Cerebellar superficial white matter</b>  |
| <b>Thalamus</b>                             |
| <b>Caudate</b>                              |
| <b>Putamen</b>                              |
| <b>Pallidum</b>                             |

Table S3: Motor-associated regions of interest

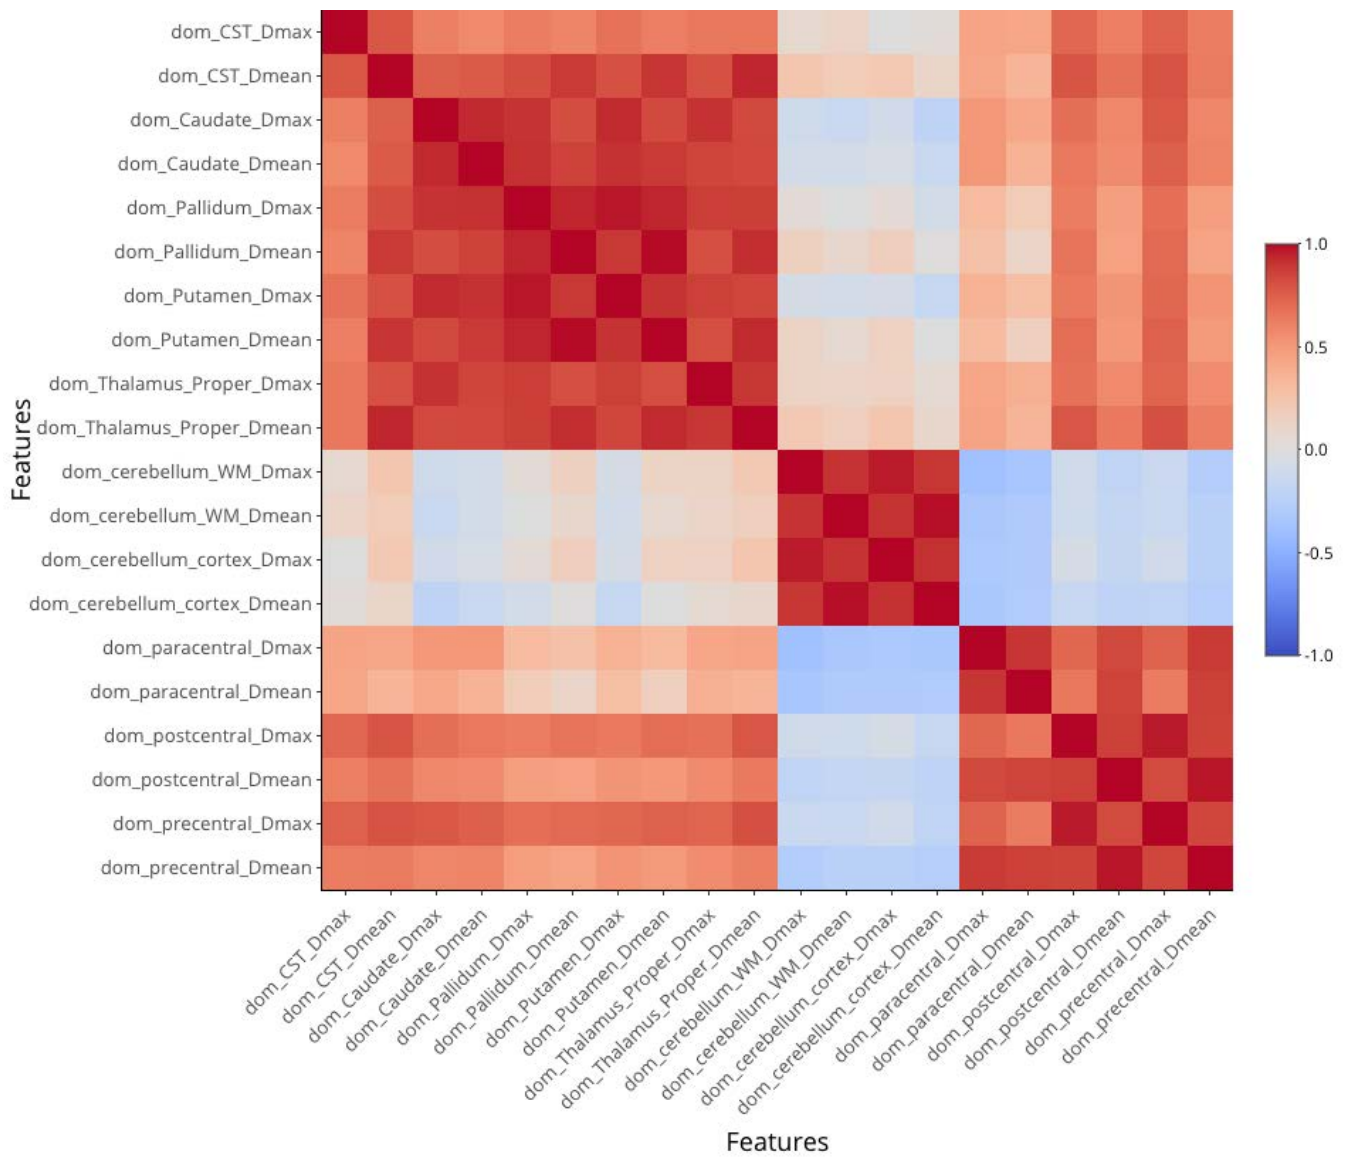

Fig S1: Pearson correlation heat map for dominant-sided dosimetric variables.

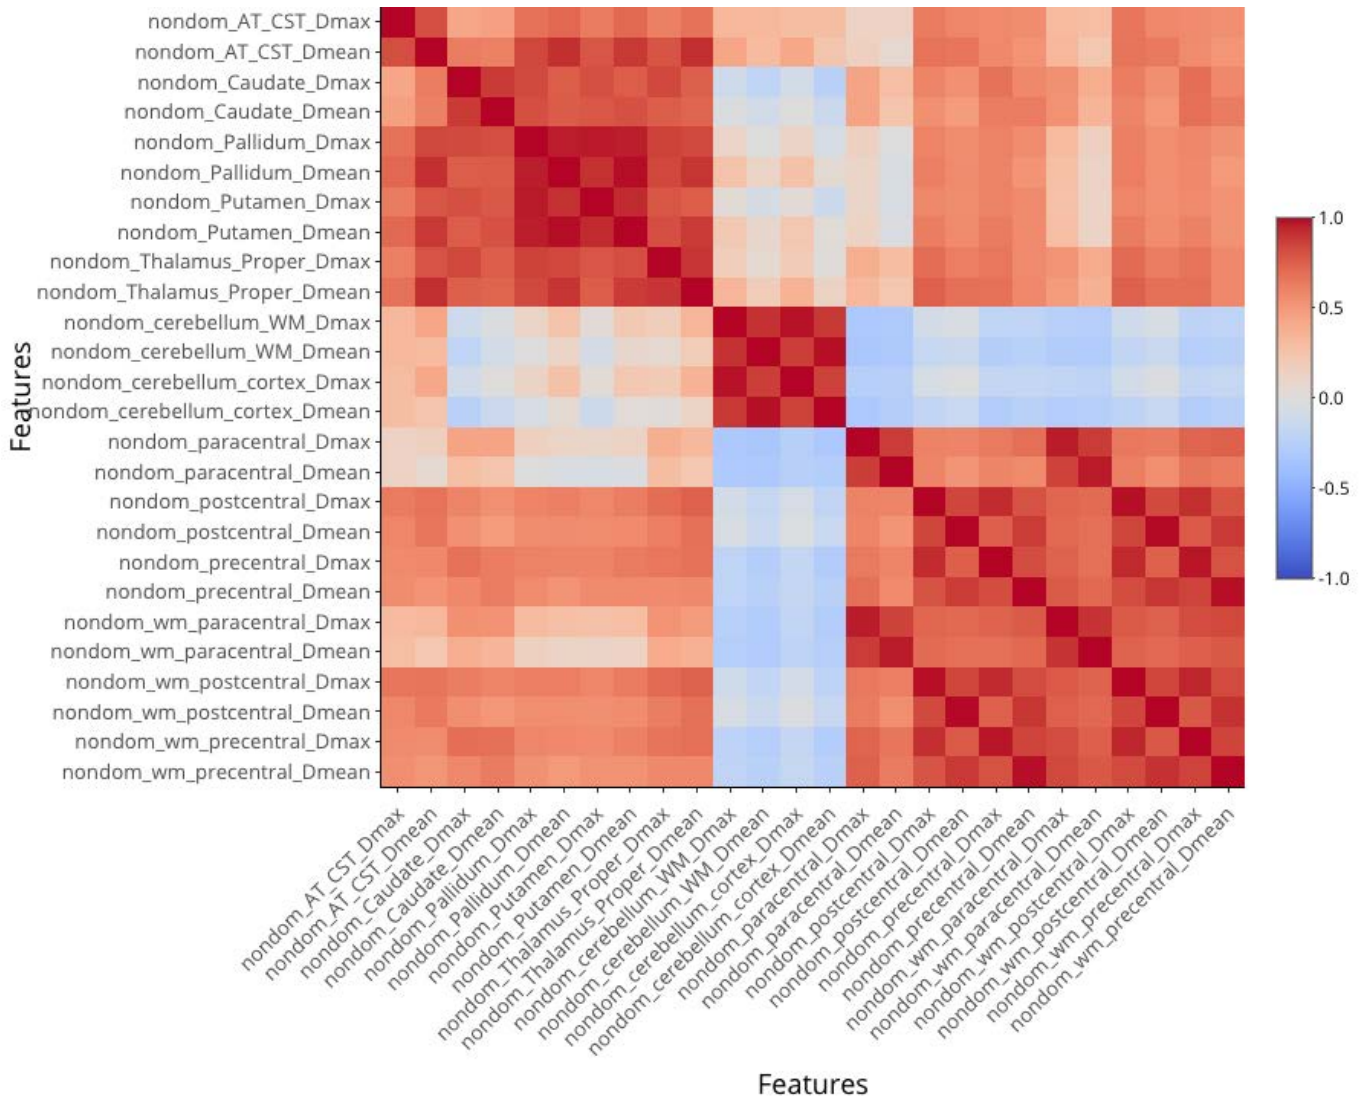

Fig S2: Heatmap for Pearson correlation between non-dominant sided dosimetric variables

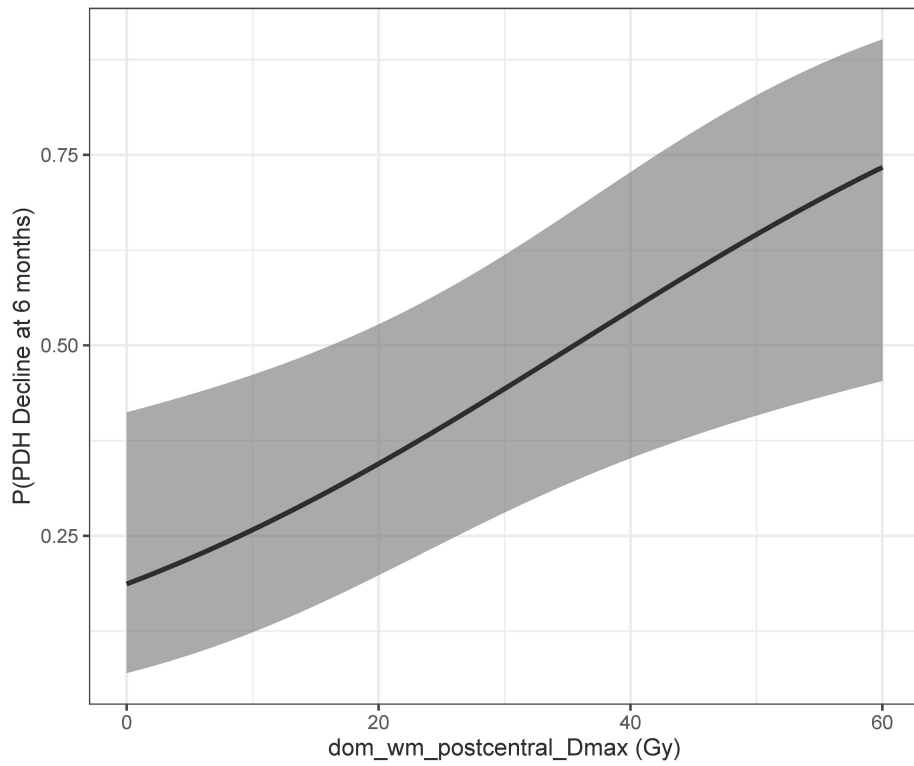

Fig S3: Logistic NTCP curve for the single term model produced using automated bootstrapped regression

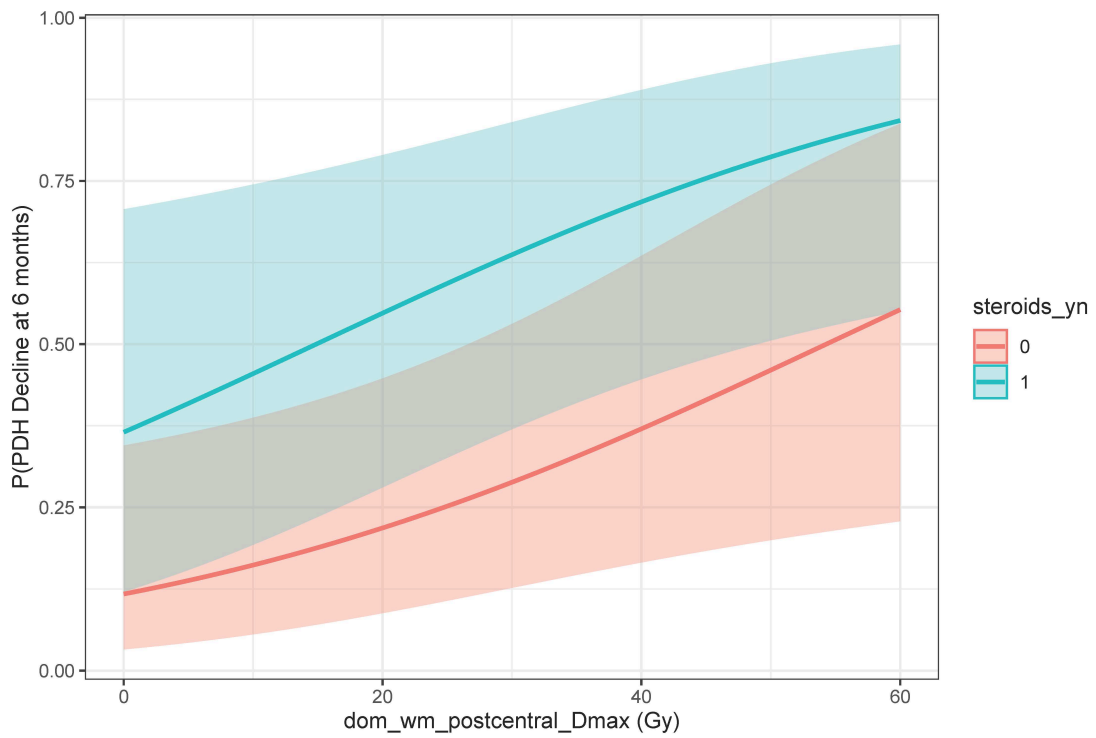

Fig S4: Logistic NTCP curve for the two term model produced using LASSO (coefficients here are unregularized)
